# Supplementary material
Source: Springer Nature journal article supplement (https://www.springermedizin.de/resource/supplementary/12974_2013_918_MOESM2_ESM.pdf/9600154)
Supplement: MOESM2 [file 9600154]

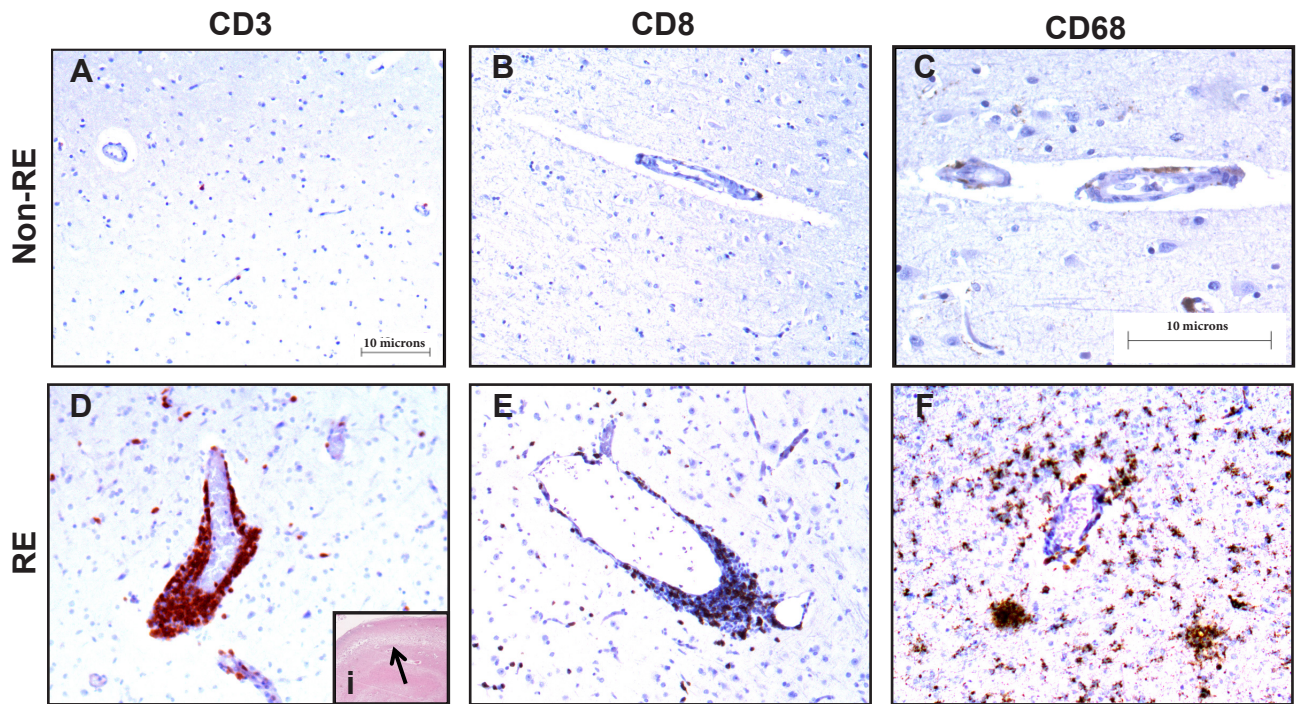

**Supplementary Figure 2:** Cortical changes in RE. (A) CD3 $\epsilon$  expression in cortex of non-RE patient compared with RE (B). H&E staining shows cortical injury in RE cortex (Di, arrow in inset) CD8 immunoreactivity in non- RE cortex (B) compared with RE cortex (E). CD68 immunolabeling of macrophages in non-RE (C) and RE (F) cortex. (original magnification A,B,D and E 100X, C and F 200X)
